# Supplementary material for: HS1 protein is differentially expressed in chronic lymphocytic leukemia patient subsets with good or poor prognoses
Source: JCI journal article supplement (doi:10.1172/jci24276), 2005-06-01
Supplement: sd1 [file 1]

Supplementary information

**Table 1**

**Proteins identified by MALDI-TOF MS analysis**

| spot         | Protein name                                        | Accession<br>number | pI/Mr      |            | match.<br>pep. | seq.<br>cov. | Mascot<br>score |
|--------------|-----------------------------------------------------|---------------------|------------|------------|----------------|--------------|-----------------|
|              |                                                     |                     | exp.       | theor.     |                |              |                 |
| <b>Right</b> | Hematopoietic lineage cell specific protein 1 (HS1) | gi 123577           | 4.83/79432 | 4.74/53998 | 19             | 43%          | 184             |
| <b>Left</b>  | Hematopoietic lineage cell specific protein 1 (HS1) | gi 123577           | 4.86/79212 | 4.74/53998 | 18             | 36%          | 172             |

MALDI-TOF= Matrix Assisted Laser Desorption Ionization-Time Of Flight; MS= Mass Spectrometry; pI/Mr= Isoelectric point / relative molecular mass; exp.= experimental; theor.= theoretical; match. pep.= matching peptides; seq. cov.= sequence coverage
